# Supplementary material
Source: JCI journal article supplement (doi:10.1172/jci172848)

Full unedited gel for Figure 1f

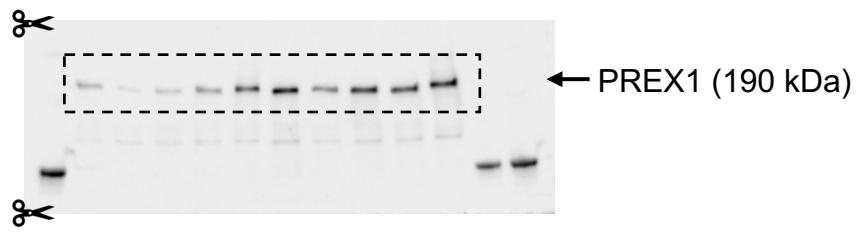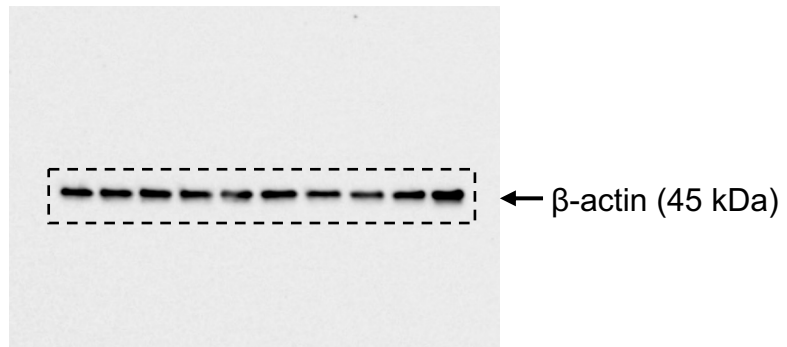

Full unedited gel for Figure 2A

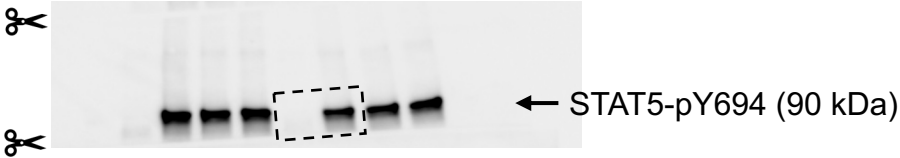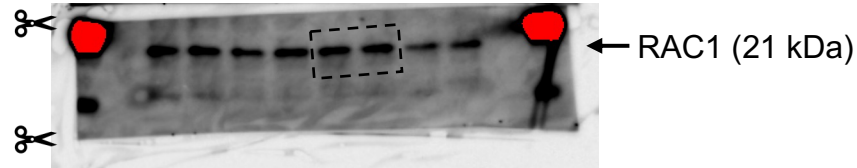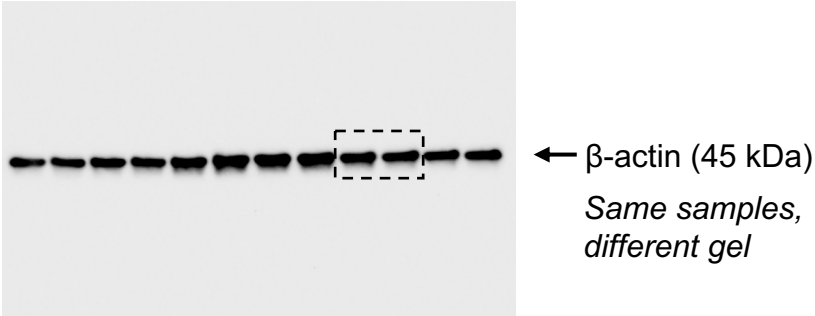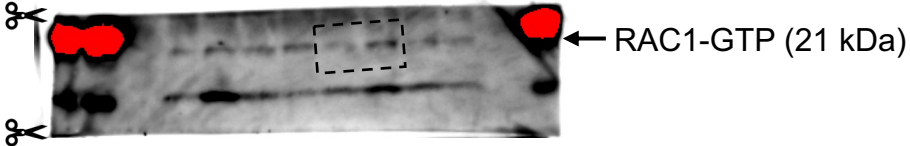

Full unedited gel for Figure 2B

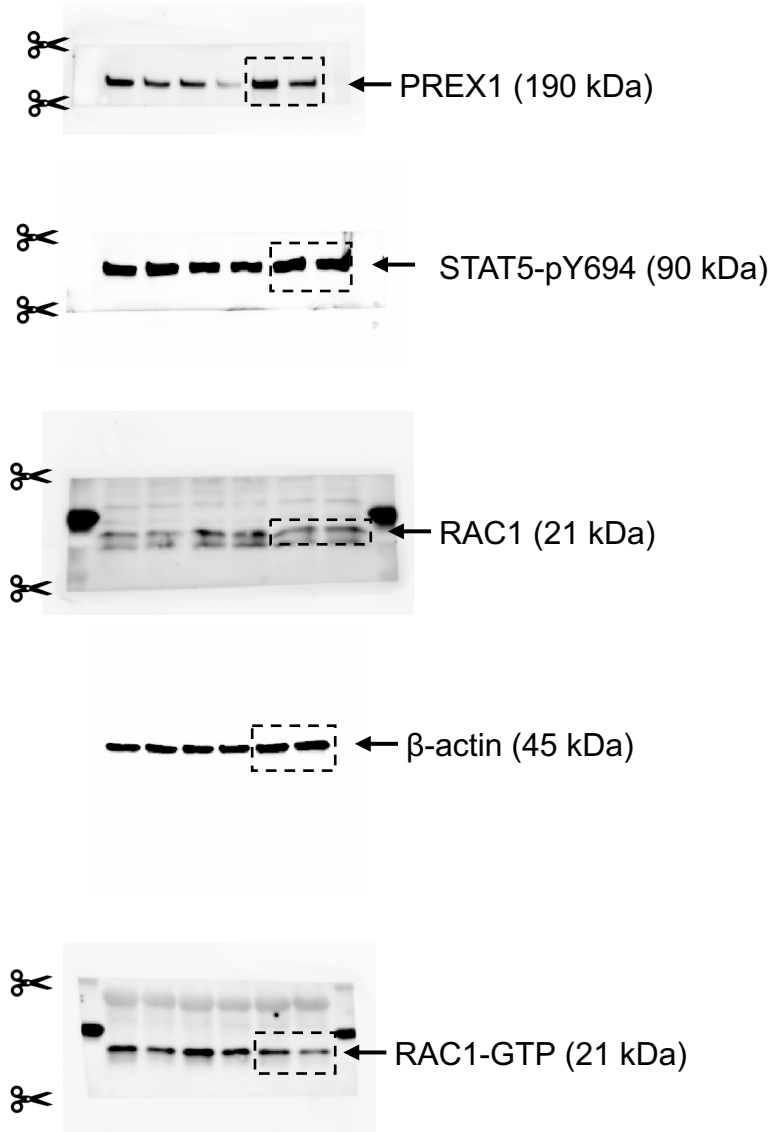

Full unedited gel for Figure 3H

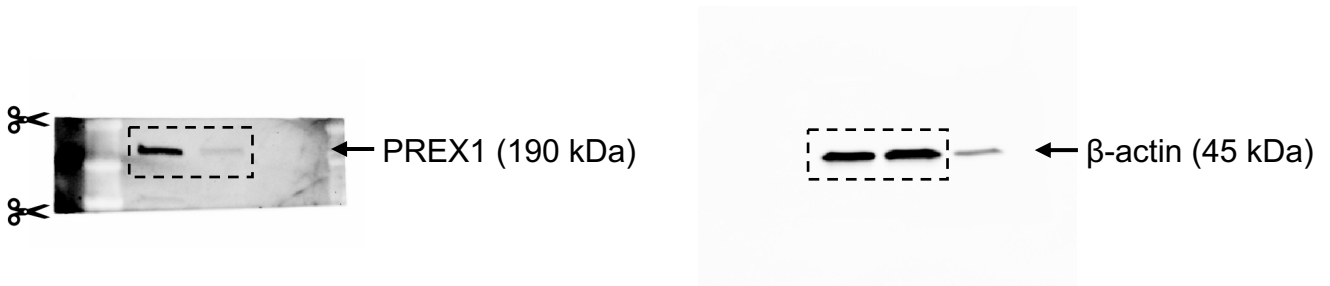

### Full unedited gel for Figure 4A

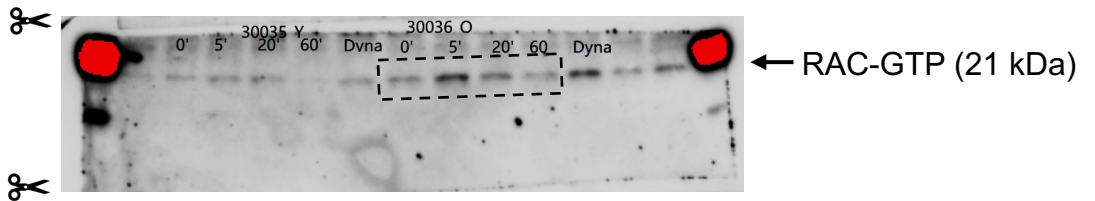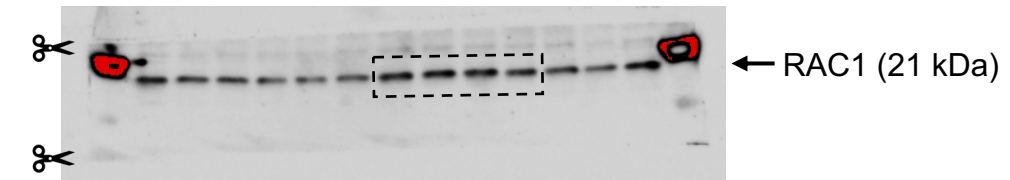

### Full unedited gel for Figure 4B

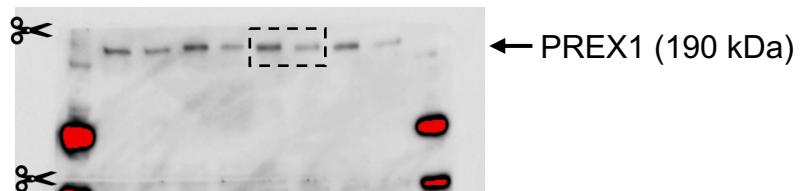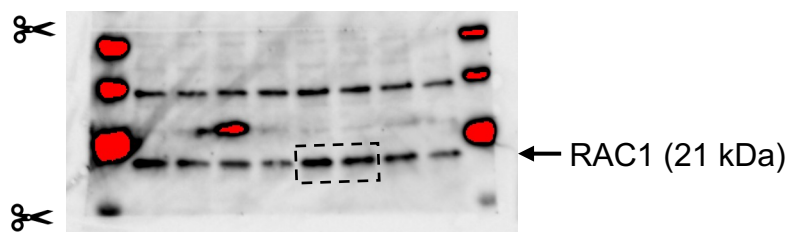

Full unedited gel for Figure S2B

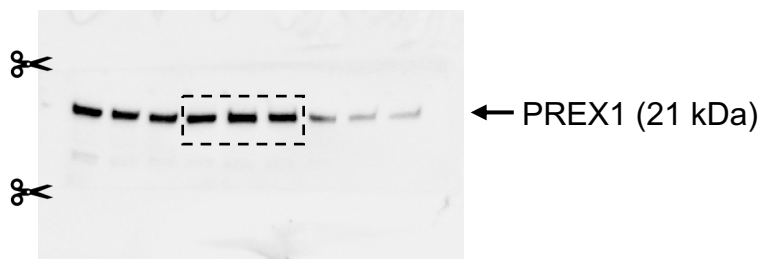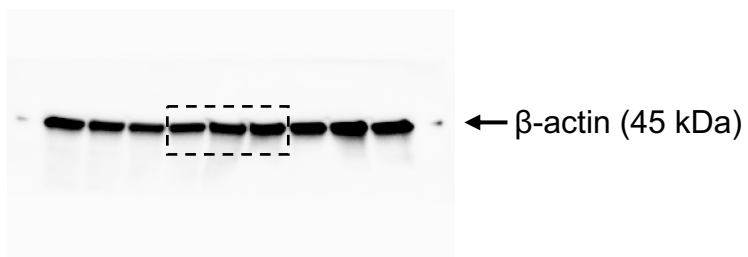

Supplement: sd2 [file 2]
